# Supplementary material for: pepsickle rapidly and accurately predicts proteasomal cleavage sites for improved neoantigen identification
Source: Oxford University Press journal article supplement (doi:10.1093/bioinformatics/btab628), 2021-09-03
Supplement: btab628_supplementary_data.zip [file btab628_supplementary_data.zip]

Archive with 2 entries (2 files):
- full_supp_table_file.pdf
- Supplemental_figures_clean.pdf
